# Supplementary material for: Curcumin inhibits cell proliferation and migration in NSCLC through a synergistic effect on the TLR4/MyD88 and EGFR pathways
Source: PubMed Central journal article supplement — Oncol Rep. 2019 Aug 14;42(5):1843–55. doi: 10.3892/or.2019.7278 (PMC6775800; doi:10.3892/or.2019.7278), 2019-08-14

Figure S1. Semi-quantitative analysis of western blotting revealed the effects of curcumin on the expression of cell cycle proteins in A549 cells. Analysis of western blotting demonstrated that curcumin affected the expression of numerous cell cycle-related proteins in A549 cells, including (A) cyclin B1, cyclin E1, cyclin A1, cyclin A2 and cyclin D1; (B) p15, p21, CDK6, CDK4 and CDK1; and (C) c-Jun, p-c-Jun Ser63, JunB, p-JunB Ser259, c-fos and p-c-fos Ser32.  $\alpha$ -tubulin was used as a control. Data are presented as the mean  $\pm$  standard deviation (n=3). \*P<0.05, \*\*P<0.01 and \*\*\*P<0.001 vs. the DMSO group. CDK, cyclin-dependent kinase; p-, phosphorylated.

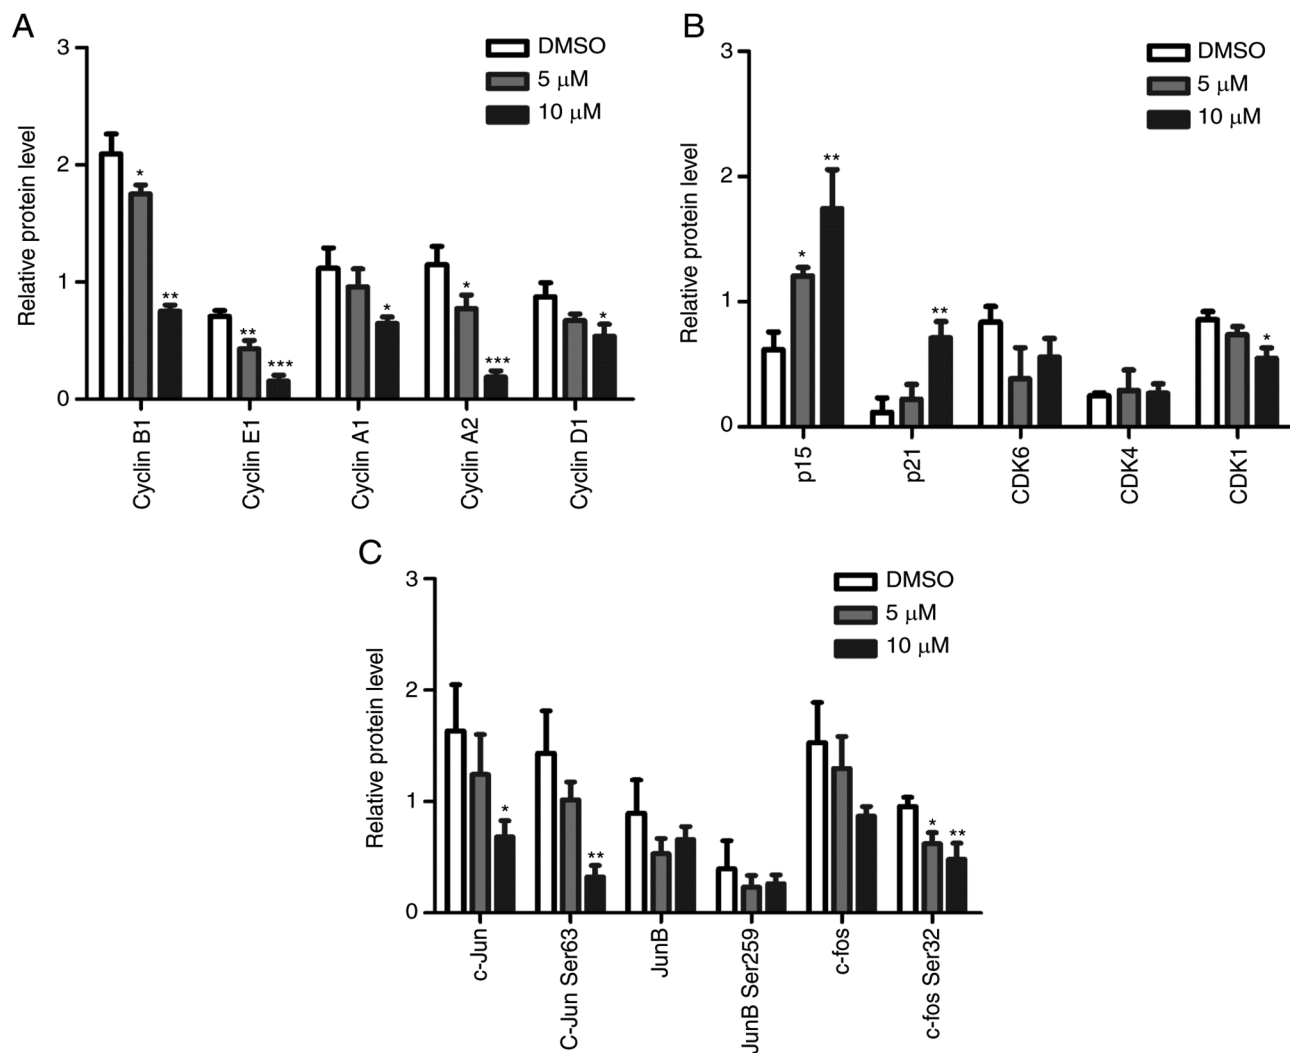

Figure S2. Semi-quantitative analysis of western blotting revealed the effects of curcumin on the expression of migration-related proteins in A549 and H226 cells. Analysis of western blotting demonstrated that curcumin affected the expression of migration-related proteins in (A) A549 and (B) H226 cells, including E-cadherin, Vimentin, TCF8, Snail and Slug.  $\alpha$ -tubulin was used as a control. Data are presented as the mean  $\pm$  standard deviation (n=3). \*P<0.05, \*\*P<0.01 and \*\*\*P<0.001 vs. the DMSO group. TCF8, transcription factor 8.

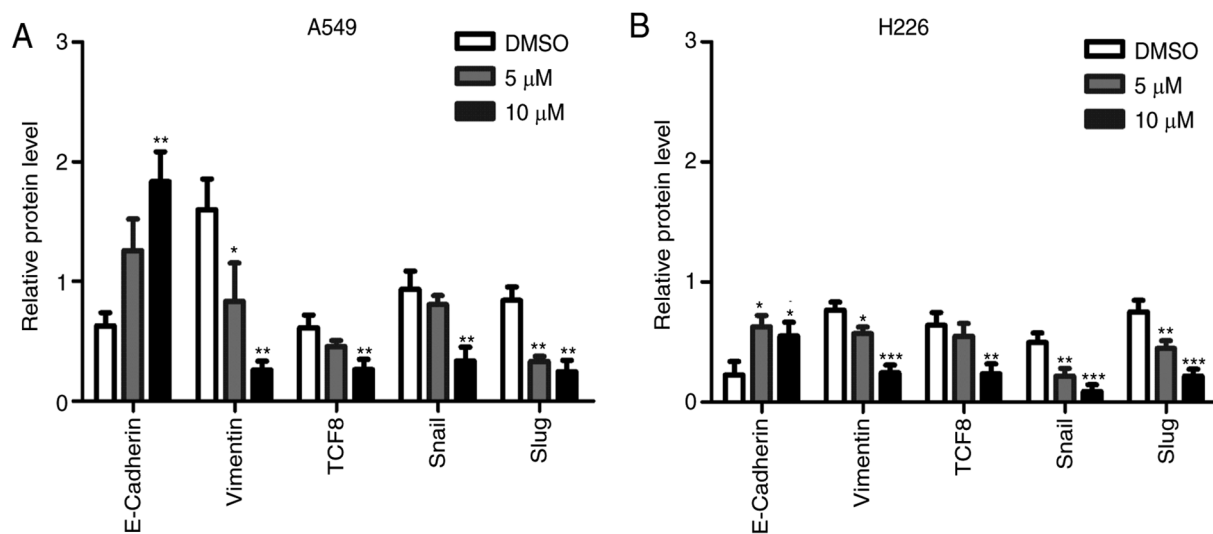

Figure S3. Semi-quantitative analysis of western blotting revealed that curcumin affects the TLR4/MyD88 and EGFR signaling pathways in NSCLC cell lines. Analysis of western blotting demonstrated that various doses of curcumin affected the expression of TLR4/MyD88 and EGFR signaling pathway-related proteins in (A) A549 and (B) H226 cells. Analysis of western blotting demonstrated the effects of treatment with curcumin for various durations on the expression of TLR4/MyD88 and EGFR signaling pathway-related proteins in (C) A549 and (D) H226 cells. Analysis of western blotting demonstrated that EGF affected TLR4/MyD88 and EGFR levels in (E) A549 and (F) H226 cells, which were pretreated with either DMSO or curcumin. Data are presented as the mean  $\pm$  standard deviation (n=3). \*P<0.05, \*\*P<0.01 and \*\*\*P<0.001 vs. the DMSO or 0 h group or cur group. EGF, epidermal growth factor; EGFR, EGF receptor; p-, phosphorylated; TLR4, Toll-like receptor 4.

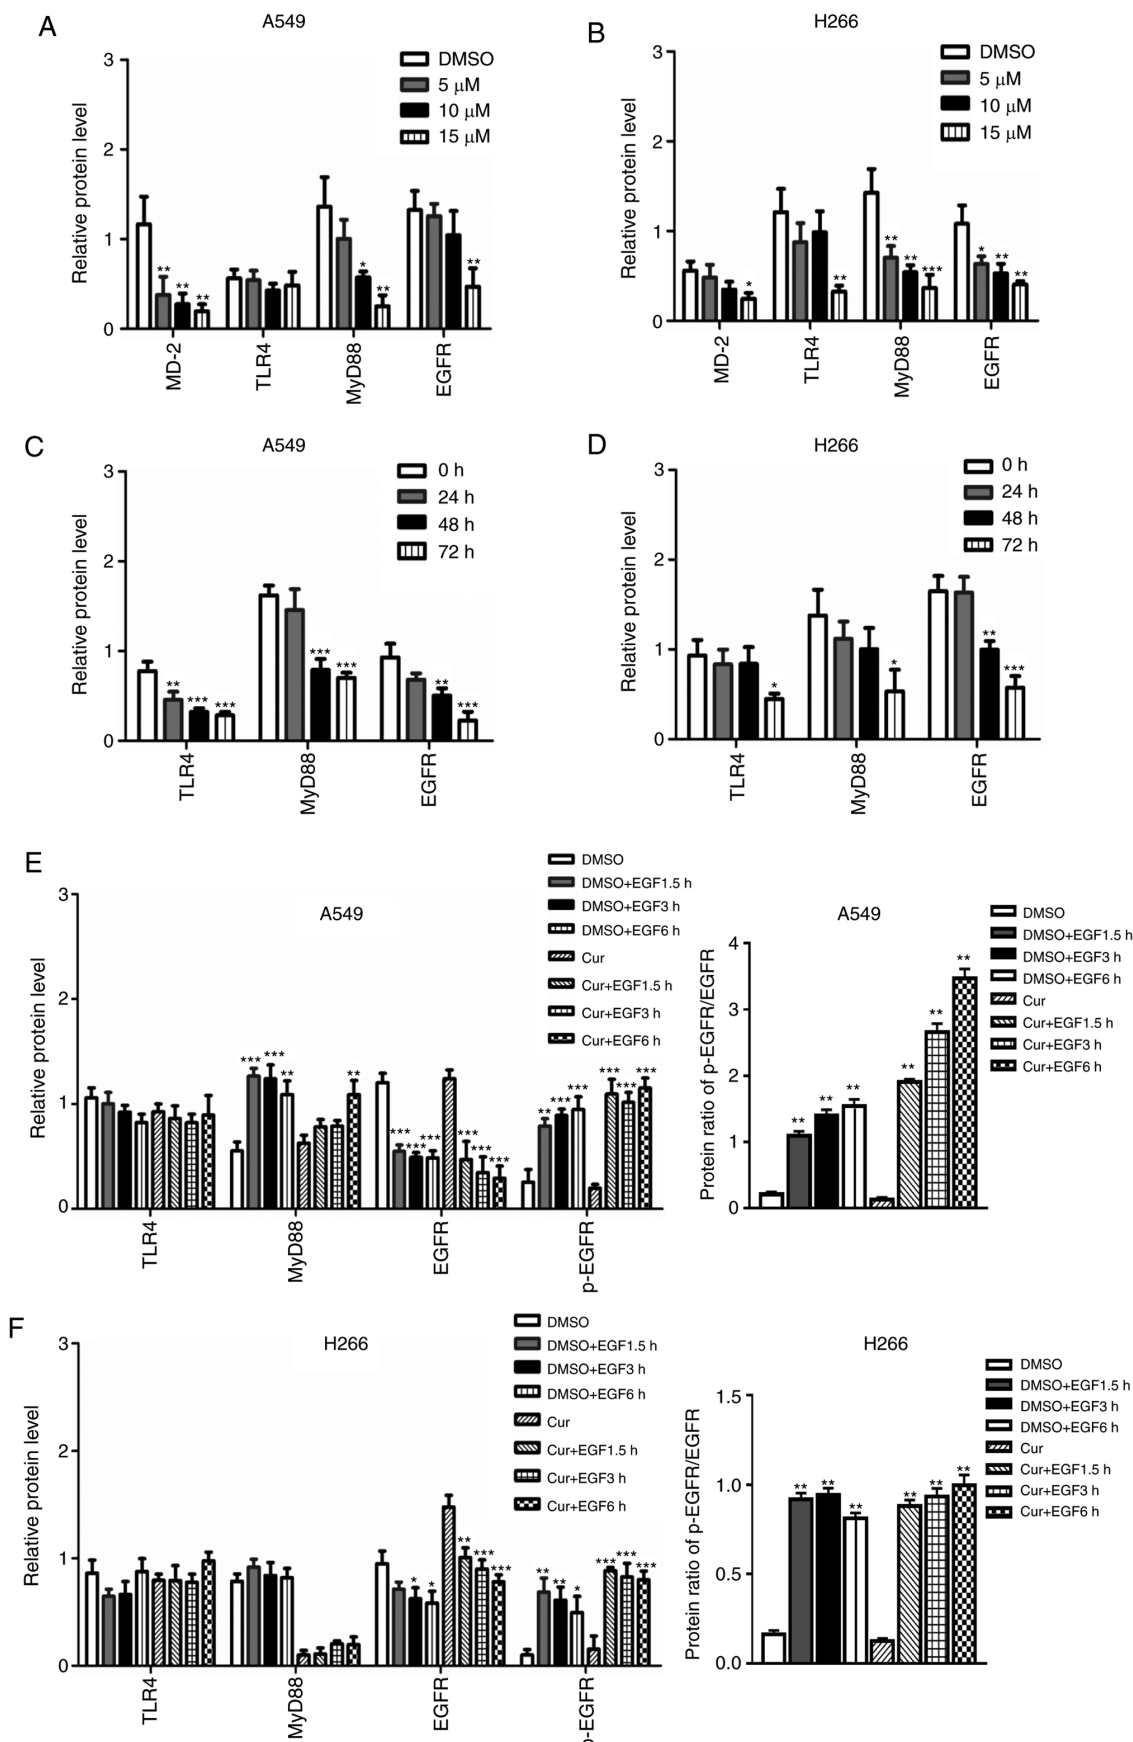

Figure S4. Survival analysis of epidermal growth factor receptor expression in patients with lung cancer using the Kaplan-Meier Plotter database. HR, hazard ratio.

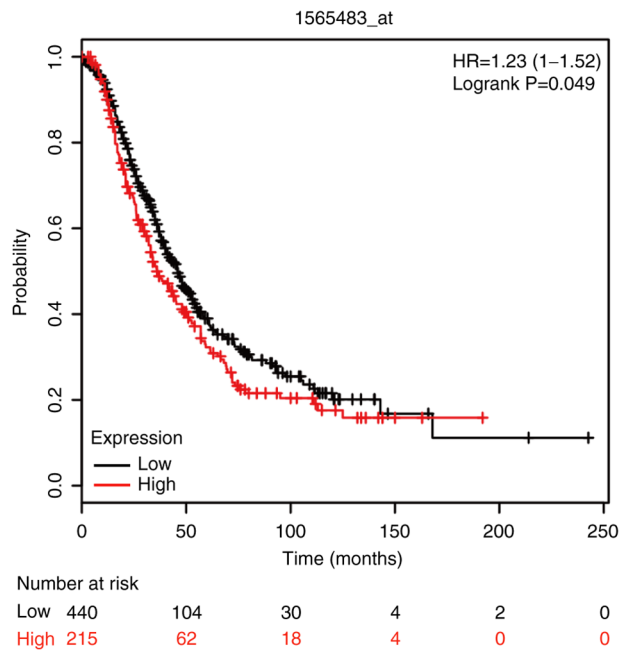

Supplement: Supplementary_Data.pdf [file Supplementary_Data.pdf]
